# Supplementary material for: Porous hydrogel microspheres with excellent temperature-sensitive, magnetic and fluorescent properties for drug delivery
Source: Royal Society of Chemistry journal article supplement (doi:10.1039/d4ra04593a), 2024-01-01
Supplement: d4ra04593a1.pdf [file d4ra04593a1.pdf]

## Porous hydrogel microspheres with excellent temperature-sensitive, magnetic and fluorescent properties for drug delivery

Shilin Tang<sup>a</sup>, Chen He<sup>a</sup>, Haie Zhu<sup>a, \*\*</sup>, Zhenyang Wen<sup>a</sup>, Xiaoling Zhang<sup>a</sup>, Qifeng Liu<sup>a</sup>, Bo Tang<sup>a, \*</sup>, Tian Xia<sup>a</sup>, Chaolong Yang<sup>a</sup>

<sup>a</sup>College of Materials Science and Engineering

Chongqing University of Technology

Chongqing 400054, China

Corresponding author E-mail: [\\*\\*zhuhaie@cqut.edu.cn](mailto:**zhuhaie@cqut.edu.cn)

\* [tangbo@cqut.edu.cn](mailto:tangbo@cqut.edu.cn)

### Preparation of OA/NaUA-Fe<sub>3</sub>O<sub>4</sub> nanoparticles:

Firstly, certain amount of FeCl<sub>3</sub>·6H<sub>2</sub>O (11.55 g) and FeCl<sub>2</sub>·4H<sub>2</sub>O (5.79 g) were dissolved in deionized water (40 mL) before introduced into a three-necked round-bottomed flask under nitrogen atmosphere. Then, NH<sub>3</sub>·H<sub>2</sub>O (35 mL) was added to the above solution under vigorous stirring to obtain a black precipitate, which was heated at 70 °C for 1 h. After that, the black precipitate was separated by a magnetite and washed with deionized water several times to remove excess NH<sub>3</sub>·H<sub>2</sub>O to obtain Fe<sub>3</sub>O<sub>4</sub> nanoparticles. Secondly, the purified Fe<sub>3</sub>O<sub>4</sub> nanoparticles were redispersed in a mixture of anhydrous ethanol (25 mL) and deionized water (25 mL) and introduced to a three-necked round-bottomed flask under nitrogen under vigorous stirring. Then, oleic acid (OA, 2 g) was added into the above mixture after the temperature reached up to 80 °C, the reaction proceeded for 1 h to prepare OA-Fe<sub>3</sub>O<sub>4</sub> nanoparticles, which were collected by a magnetite and purified with anhydrous ethanol when the mixture was cooled to room temperature. Thirdly, the purified hydrophobic OA-Fe<sub>3</sub>O<sub>4</sub> nanoparticles were redispersed in CHCl<sub>3</sub> (25 mL) and added into a three-necked flask, then an aqueous solution (40 mL) containing 3 g of NaUA was added to the solution. The mixture was stirred at 45 °C for 1 h and sonicated for 10 min to remove chloroform until the weight of the final solution became constant. Finally, water-soluble OA/NaUA-Fe<sub>3</sub>O<sub>4</sub> nanoparticles with a solid content of 7 wt% were obtained.

**Preparation of Eu(AA)<sub>3</sub>Phen:**

Firstly, certain amount of Eu<sub>2</sub>O<sub>3</sub> (2 mmol) was dissolved in excess concentrated HCl and evaporated to near dryness to generate EuCl<sub>3</sub>, which was then dissolved with anhydrous ethanol (40 mL) to obtain a solution of EuCl<sub>3</sub> in anhydrous ethanol. Secondly, AA (12 mmol) and Phen (4 mmol) were dissolved in 40 mL anhydrous ethanol and added into a single-neck round-bottom flask. Then 40 mL of the above EuCl<sub>3</sub> solution was slowly dropped into the flask under constant stirring. The pH value of the mixture solution was adjusted to 8 with 28 wt% NH<sub>3</sub>·H<sub>2</sub>O solution, and the mixture was stirred at 60 °C for 8 h. Finally, the mixture was filtered, then washed with anhydrous ethanol and dried in vacuum at 50 °C for 6 h to obtain a powder of Eu(AA)<sub>3</sub>Phen.

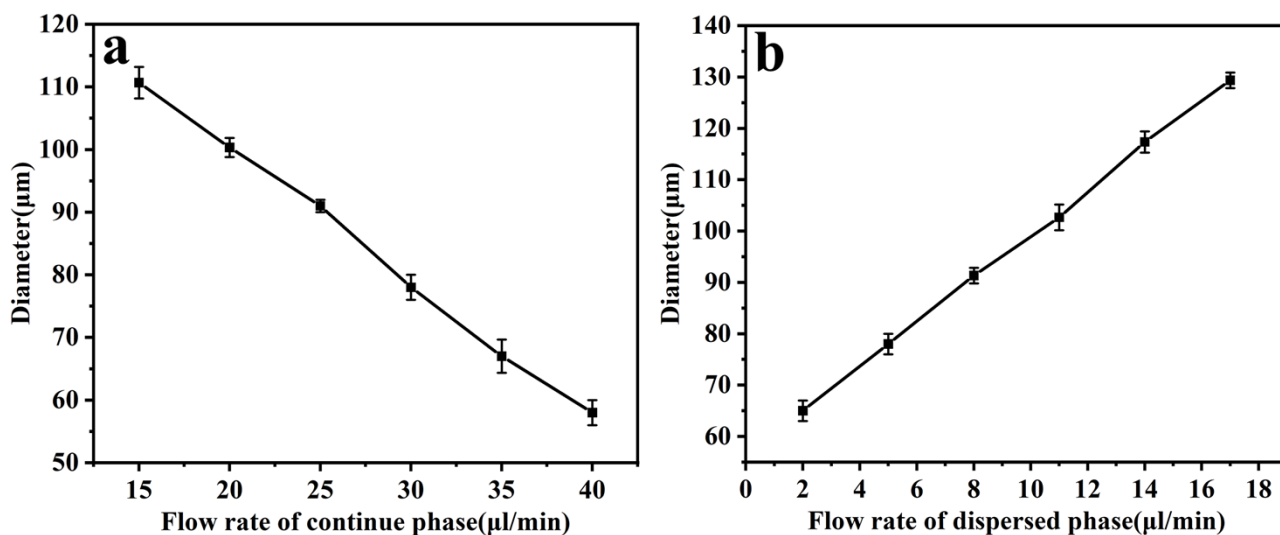

**Fig. S1** (a) Effect of continuous phase flow rates on the microdroplet size when the dispersed phase flow rate is 5  $\mu\text{L}/\text{min}$ ; (b) Effect of dispersed phase flow rates on the microdroplet size when the continuous phase flow rate is 30  $\mu\text{L}/\text{min}$ .

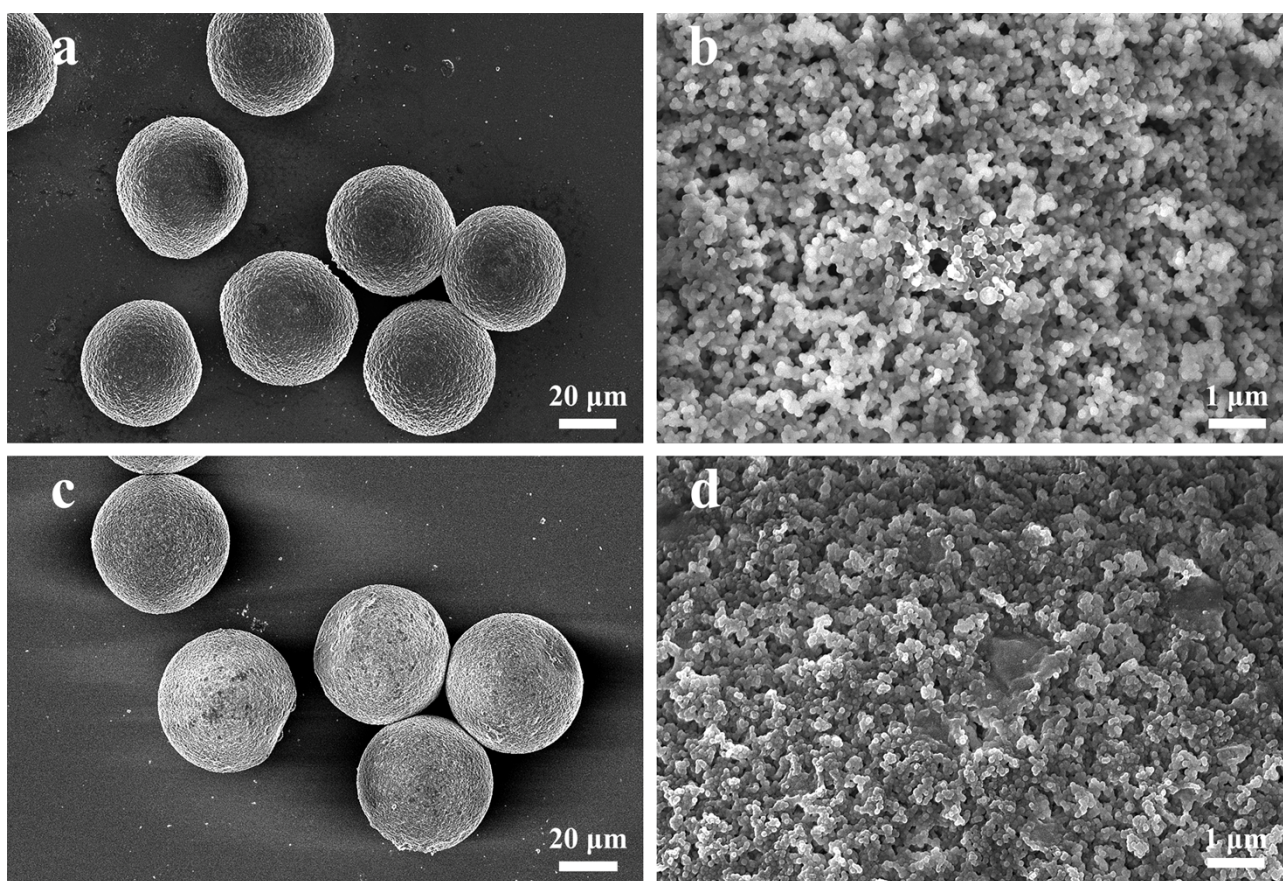

**Fig. S2** SEM images of two different porous hydrogel microspheres: (a-b)  $\text{A}_{15}\text{C}_2$ ; (c-d)  $\text{A}_{15}\text{C}_8$ . (The two samples were prepared at the same flow rate of continuous/disperse phase of  $20\mu\text{L}\cdot\text{min}^{-1}/5\mu\text{L}\cdot\text{min}^{-1}$ )

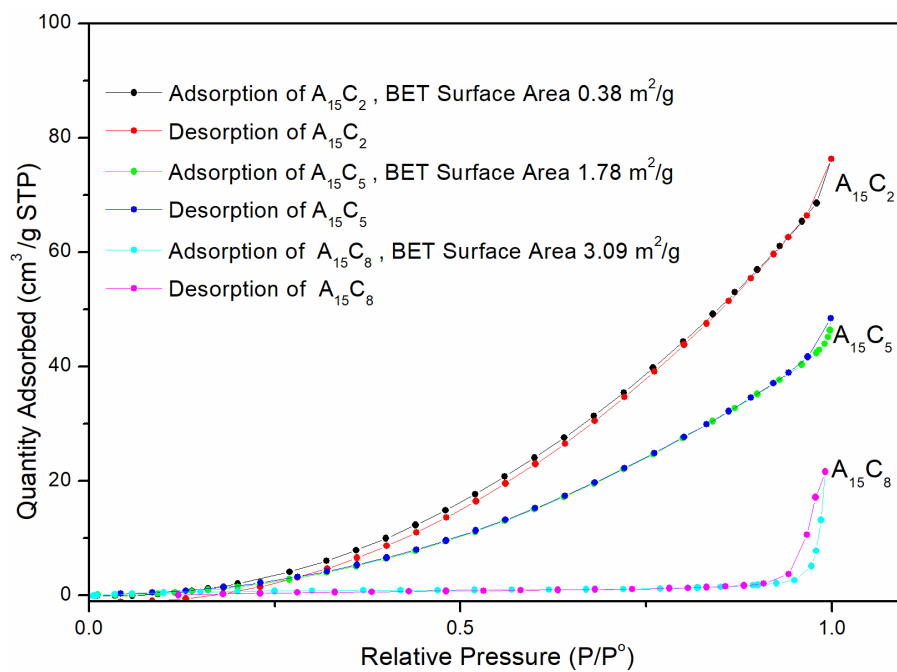

Fig. S3 Nitrogen adsorption-desorption isotherms of porous hydrogel microspheres  $A_{15}C_2$ ,  $A_{15}C_5$  and  $A_{15}C_8$ .

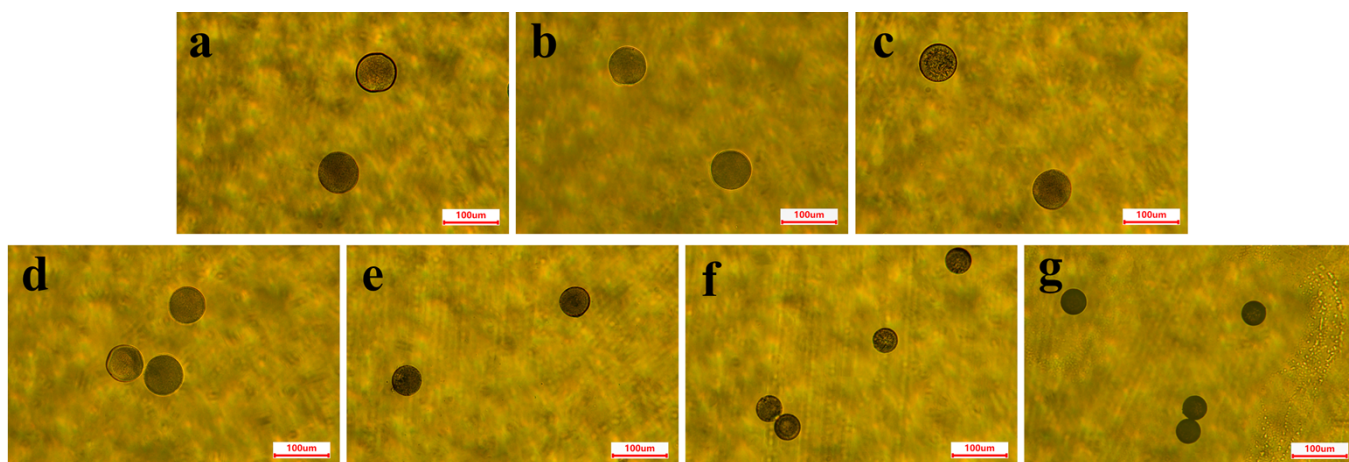

**Fig. S4** Optical microscope images of porous hydrogel microspheres  $A_{15}C_5$  at different temperatures showing different diameters: (a) 25 °C, 78 $\mu$ m, (b)30 °C, 77 $\mu$ m , (c)35°C, 76 $\mu$ m , (d)40°C, 74 $\mu$ m , (e)45°C, 61 $\mu$ m, (f) 50°C, 52 $\mu$ m, (g) 55 °C, 50 $\mu$ m.



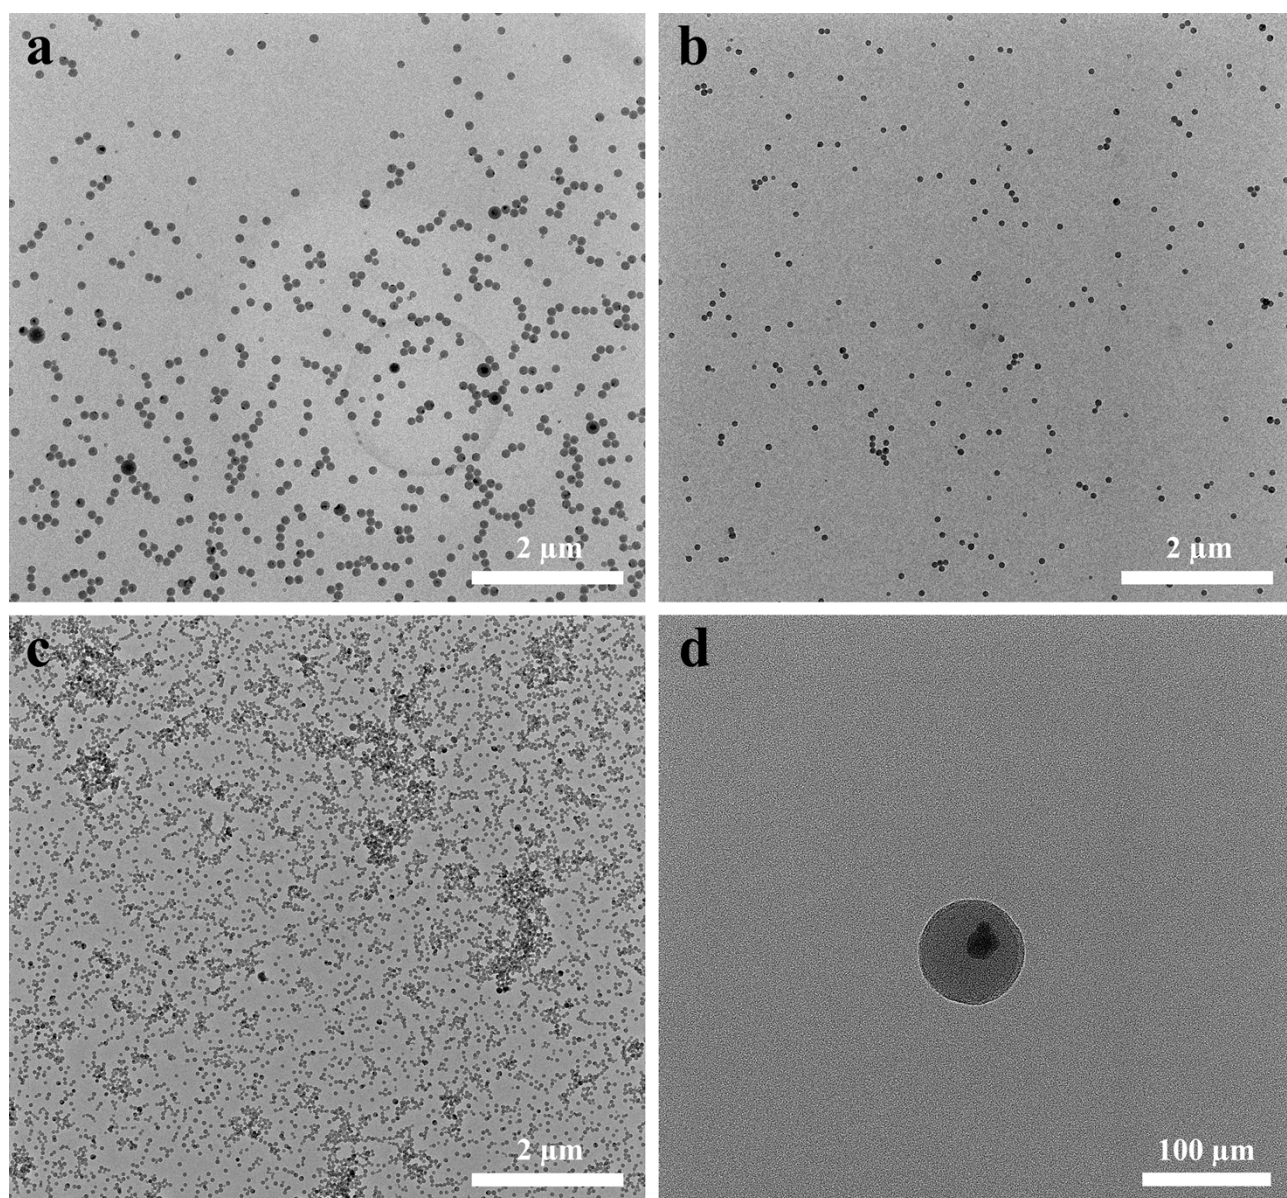

**Fig. S5** TEM images of  $\text{Fe}_3\text{O}_4/\text{P}(\text{St-co-Eu}(\text{AA})_3\text{Phen})$  nanomicrospheres: (a)  $\text{A}_{10}$ ; (b)  $\text{A}_{15}$ ; (c)  $\text{A}_{20}$ ; (d)  $\text{A}_{15}$  image at high magnification. (The average diameters of  $\text{A}_{10}$ ,  $\text{A}_{15}$ ,  $\text{A}_{20}$  analyzed from Fig. S4 a-c are 122 nm, 83 nm and 58 nm, respectively.)

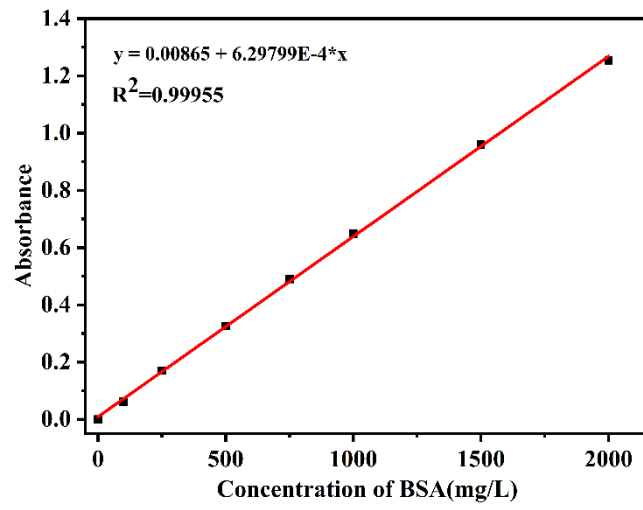

Fig. S6 Standard curve of BSA aqueous solution
